# Supplementary material for: Water-in-water mesophases for templating inorganics
Source: Royal Society of Chemistry journal article supplement (doi:10.1039/b405610h), 2004-01-01
Supplement: b405610h.pdf [file b405610h.pdf]

## Supporting Information

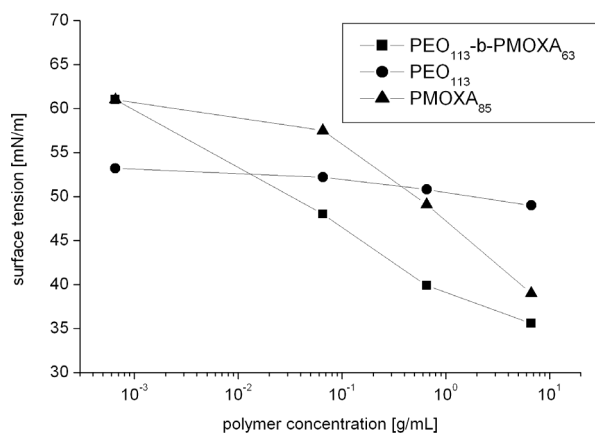

**Figure 1:** Surface tension of **1**, PEO<sub>113</sub>, and PMOXA<sub>85</sub>, which is similar to the PMOXA block in **1**. These measurements indicate a slight hydrophilicity difference between the two blocks.
